# Supplementary material
Source: Research Square preprint supplement (doi:10.21203/rs.3.rs-10062813/v1)
Supplement: Supplementary file 1 [file 92e0040803e839638a01abb5.docx]

**Supplementary Information: Repair as a System-Level Enabler of Circularity in the Electrical and Electronic Equipment Sector**

# **Supplementary Table S1. Interpretation and use of 10R circular economy strategies in the reviewed literature**

Description: This table summarises how circular economy strategies (R0–R9) are defined and applied across the reviewed literature. It highlights variations in terminology, overlaps between strategies, and common ambiguities, particularly where concepts such as reuse, repair, refurbishment, and remanufacturing are used interchangeably or inconsistently across studies.

| **R Strategy** | **Definition** | **Remarks on usage in literature** |
| --- | --- | --- |
| **R0 Refuse** | Avoid the use of certain products or raw materials altogether in the creation of goods, processes, or through services offered. | For consumers, itoften means declining to buy new products; for producers, it implies eliminating specific materials or inputs during manufacturing, or also refusing the need for the product altogether by offering an alternative. |
| **R1 Rethink** | Reconsider how products are designed, used, or provided (e.g. shifting ownership models or improving product use and maintenance). | Often refers to rethinking business models or service models (such as product-as-a-service or shared use) to maximize product utility and longevity. |
| **R2 Reduce** | Use fewer raw materials and resources in products and services. | Commonly discussed in the context of dematerialization—minimizing material and energy per product. Reducefrequently appears alongside **R0 (Refuse)** as a strategy to limit resource consumption. |
| **R3 Reuse** | Use products again for the same purpose instead of discarding them. | In consumer contexts, reuse typically involves buying or selling second-hand goods for continued use. In production contexts, some authors use reuse to describe component reuse which may in fact indicate R**6 (Remanufacture)** or R7 (Repurpose) where parts of old products are used in new products. |
| **R4 Repair** | Extend a product’s life through maintenance and fixing of faults. | Repair is widely used in its intended sense—fixing items to extend their use. It is often mentioned alongside other life-extension strategies (R3 Reuse, R5 Refurbish, R6 Remanufacture), though not all sources explicitly distinguish between these terms. |
| **R5 Refurbish** | Restore a used product into a like-new condition for extended use. | Used in its intended sense especially in consumer contexts (e.g. consumers purchasing refurbished electronics). However, the term is not always explicitly used in literature; authors may simply describe this process as repairing and reselling products. |
| **R6 Remanufacture** | Rebuild a product (or create new products) using discarded or recovered parts, to serve the original purpose. | In consumer-focused discussions, remanufacture appears when talking about the availability of remanufactured products (e.g. buying a remanufactured engine). In manufacturing literature, the process is sometimes not explicitly labelled remanufacturing – authors might refer to it as **reuse of components**, effectively describing remanufacturing without using the term. |
| **R7 Repurpose** | Reuse discarded product parts in a new product with a different purpose than the original. | Literature often discusses similar concepts as creative reuse or adaptation of materials (for instance, in frugal innovation examples where waste materials are given new functions). |
| **R8 Recycle** | Process waste into raw materials for use in new products. | Recycleis used in the conventional way (materials recovery from waste). Some authors also emphasize designing products with recycled materials, which ties this strategy to **R2 (Reduce)** or **R0 (Refuse)** by cutting down the need for virgin inputs. |
| **R9 Recover** | Retrieve remaining value from waste, often through energy recovery (e.g. incineration with energy capture) when material recycling isn’t feasible. | The term recoveris applied variably. Most sources userecoveryto mean energy recovery from waste, while some include material recovery in this term. In fact, authors often treat recovery as a subset of recycling (e.g. discussing waste recycling processes that implicitly include energy recovery) without always distinguishing the two. |

# **Supplementary Table S2. Barriers to circular economy implementation in the EEE sector identified in the literature**

Description: This table presents the full set of barriers identified through the systematic review. Barriers are grouped into thematic categories and derived inductively from the coded corpus. They reflect behavioural, market, infrastructural, technological, and policy-related constraints affecting circular economy strategies across design, use-phase, and end-of-life stages.

| **Barrier** | **Sub-category** | **Description** | **Cited in** |
| --- | --- | --- | --- |
| Attitude and Behaviour | Consumer Belief | Psychological and cultural barriers driven by perceptions of quality, reliability, and status. | [1], [2], [3], [4], [5], [6], [7], [8], [9], [10], [11], [12] |
| Cost and Effort | Practical barrier related to financial burden and logistical challenges. | [1], [2], [3], [4], [9], [10], [11], [12], [13], [14], [15], [16], [17] |
| Hibernating | The practice of storing unused electronics instead of returning them for reuse or recycling. | [4], [13], [17], [18], [19], [20], [21], [22], [23], [24], [25], [26] |
| Awareness | Lack of information preventing consumers from engaging in circular practices despite willingness. | [4], [5], [11], [12], [13], [15], [21], [27], [28], [29], [30], [31], [32], [33], [34], [35], [36], [37], [38] |
| Collaboration | Between EEE value chain | Lack of collaboration across the value chain during product design and business models. | [12], [20], [26], [27], [28], [37], [39], [40], [41], [42], [43], [44], [45], [46], [47], [48] |
| Consumer engagement | Limited interaction between EEE actors and consumers leading to unclear roles and reduced participation in circular practices. | [4], [5], [7], [11], [12], [13], [17], [29], [36] |
| Legislation and Industry | Lack of collaboration between industry and policy leading to fragmented enforcement and limited circular innovation. | [5], [28], [29], [35], [37], [46], [49], [50], [51], [52], [53], [54] |
| Information data | Data on impact | Challenges in quantifying the environmental and social impacts of circular practices. | [4], [10], [15], [51], [55], [56], [57], [58] |
| Data on repair | Data needed for intermediaries to repair products effectively, including technical manuals and repair rights. | [5], [6], [7], [11], [17], [29], [46], [59], [60], [61] |
| Data to inform policy | Data required to support policymakers in making informed decisions, planning, and prioritizing circular economy policies. | [17], [22], [30], [42], [52], [62], [63], [64], [65], [66] |
| Data for planning | Operational data required for effective circular economy planning, including material flows, forecasts, and recycling capacities. | [5], [13], [24], [33], [43], [46], [54], [56], [63], [65], [67], [68], [69], [70] |
| Data management tools | Lack of tools and processes to systematically collect, track, and manage circularity data for effective decision-making. | [5], [37], [54], [58], [71], [72] |
| Infrastructure | Digitisation | The use of digital tools and automation to streamline operational processes, such as product identification and material tracking. | [14], [17], [23], [28], [43], [45], [47], [56], [62], [63], [71], [73], [74], [75], [76], [77], [78], [79], [80], [81] |
| Investment needs | The requirement for significant financial resources to establish and scale circular economy infrastructure. | [15], [17], [35], [37], [51], [54], [55], [63], [65], [76], [82] |
| Missing lifecycle thinking | The absence of a systems-based approach that considers product design, use, and end-of-life stages for circularity. | [2], [7], [11], [12], [27], [28], [41], [44], [45], [46], [51], [55], [74], [79], [83], [84], [85], [86] |
| Nature of e-waste | The diverse and non-standardized composition of e-waste, leading to high variability in waste streams. | [23], [29], [35], [44], [47], [48], [52], [59], [71], [73], [75], [87], [88], [89], [90], [91], [92], [93], [94] |
| Systems & structures | The lack of effective workflows, processes, and support structures to fully leverage existing infrastructure. | [3], [8], [13], [17], [18], [55], [65], [73], [76], [79], [95], [96], [97], [98] |
| Market | Cost vs benefit | Economic imbalance between circular strategies and linear practices. | [7], [8], [10], [27], [34], [39], [43], [46], [52], [55], [56], [61], [79], [86], [98], [99], [100] |
| Waste Quantity | Variability and volume of waste streams affecting circular operations. | [13], [17], [20], [23], [28], [30], [32], [37], [42], [55], [58], [61], [65], [71], [76], [79], [88], [89], [101], [102], [103], [104], [105], [106], [107], [108] |
| Finance & Economics | Financial constraints and limited economic support for circular initiatives. | [15], [20], [28], [34], [35], [36], [47], [65], [76], [79], [82], [86], [94], [109] |
| Linear Lock-in | Dependence on linear economic models with limited incentives for repair. | [4], [7], [11], [12], [17], [29], [39], [59], [60], [68], [89], [104], [110], [111], [112], [113] |
| Skills | Shortage of technical skills and training for circular economy operations. | [17], [29], [33], [37], [38], [47], [48], [59], [71], [74], [76], [79], [93], [94] |
| Taxation | Tax policies and financial regulations impacting circular economy practices. | [8], [11], [13], [17], [46], [55], [65], [67], [74], [79], [83], [86] |
| Trade laws | Import/export restrictions and market regulations limiting circular trade. | [8], [34], [35], [36], [54], [79], [94], [100] |
| Obsolescence | In-built Obsolescence | The deliberate design of products with a limited lifespan, often through design limitations, material quality, and technical restrictions. | [7], [9], [12], [13], [17], [19], [22], [29], [41], [59], [60], [61], [83], [108], [114] |
| Perceived Obsolescence | Consumer-driven obsolescence where products are discarded despite being functional, often influenced by marketing, trends, and social perceptions. | [3], [4], [7], [9], [10], [11, p. 3], [17], [18], [19], [22], [26], [30], [38], [41], [51], [96], [111], [115] |
| Policy | Complexity | Fragmented policies and inconsistent frameworks across regions create compliance burdens and discourage innovation. | [6], [8], [14], [16], [37], [45], [48], [72], [79], [83], [88], [100], [113] |
| Implementation | Gaps between policy design, enforcement, and industry adoption hinder systemic circular economy shifts. | [13], [14], [17], [27], [34], [36], [37], [40], [62], [66], [79], [82], [83], [86], [94], [97], [116] |
| Privacy & data security | Data security concerns and intellectual property restrictions impede circular strategies, particularly in reuse and remanufacturing. | [3], [22], [29], [50], [58], [60], [66], [72], [76], [77], [79], [89], [117], [118] |
| Scope of policy | Circular economy policies often focus narrowly on recycling, neglecting broader lifecycle strategies and systemic integration. | [11], [12], [20], [27], [28], [37], [38], [58], [59], [63], [67], [68], [72], [73], [80], [83], [93], [102], [116], [119] |
| Standardisation | Legislation & processes | Lack of harmonization across regulatory frameworks complicates compliance and slows circular economy transitions. | [9], [17], [18], [30], [35], [37], [49], [55], [58], [65], [67], [71], [73], [85], [98], [100], [105], [119] |
|  | Product design | Material complexity and non-standardized designs hinder effective recycling and disassembly. | [13], [27], [32], [41], [45], [46], [47], [48], [52], [60], [67], [73], [87], [105], [108], [120] |
|  | Taxonomy | Inconsistent definitions and classifications of waste hinder reuse and proper material recovery. | [6], [11], [27], [35], [54], [58] |
| Transparency | Informal sector | The informal sector dominates e-waste management, handling approximately 65-75% of global e-waste. | [13], [28], [35], [36], [37], [49], [68], [72], [91], [94], [96], [121] |
|  | Transboundary movement | E-waste is often exported from higher-income to lower-income regions, sometimes in violation of global agreements. | [9], [17], [30], [35], [37], [54], [68], [79], [96], [112], [122] |

# **Supplementary Table S3. Drivers enabling circular economy implementation in the EEE sector identified in the literature**

Description: This table presents the key drivers supporting circular economy implementation in the EEE sector. Drivers are identified from the same coded corpus as barriers and organised into thematic categories. The table illustrates enabling conditions such as policy support, technological innovation, market demand, and collaboration mechanisms, and highlights their context-dependent effects across different actors and lifecycle stages.

| Driver | Description | Cited In |
| --- | --- | --- |
| Affordability | The price advantage of repair, reuse and refurbished options reduces adoption barriers—especially for price-sensitive segments—and legitimises secondary markets for electronics. | [1], [8], [9], [10], [11], [16], [17], [46], [53], [95], [106] |
| Awareness | Growing consumer awareness of the environmental and social benefits of circular practices encourages more conscious purchasing, repair, and disposal decisions. | [3], [6], [9], [10], [13], [15], [17], [31], [65], [72], [106] |
| Critical Material Resilience | The concentration of valuable and scarce critical raw materials in e-waste drives circular initiatives focused on recovery, recycling, and material substitution, strengthening supply chain resilience and reducing dependency on primary resource extraction | [8], [14], [35], [39], [46], [48], [66], [70], [72], [73], [75], [79], [81], [89], [89], [93], [96], [97], [112], [123] |
| Reduced material costs | Incorporating recycled or closed-loop materials lowers raw material procurement expenses, offering producers a cost advantage while mitigating price volatility and supply risks associated with virgin resource markets. | [3], [19], [35], [39], [46], [47], [56], [74], [76], [101] |
| Reduced compliance costs | Integrating circular economy practices into production and value chains lowers regulatory risks by reducing emissions, product footprints, and waste, thereby minimising exposure to penalties and compliance-related costs under environmental and product regulations | [3], [11], [30], [37], [50], [53], [62], [66], [68], [72], [98], [124] |
| New Market Opportunities | Circular business models—such as product-as-a-service, take-back schemes, and certified refurbished sales—enable producers to access new customer segments and revenue streams while extending product lifecycles and market presence. | [11], [17], [29], [46], [56], [58], [65], [79], [86], [95], [106] |
| Policy | Circular economy transitions are accelerated by supportive policies—such as eco-design requirements, right-to-repair legislation, and extended producer responsibility—which create incentives for sustainable production, product longevity, and end-of-life resource recovery. | [1], [2], [7], [11], [13], [14], [17], [18], [21], [27], [29], [37], [38], [49], [51], [53], [58, p. 3], [59], [66], [67], [69], [79], [84], [93], [96], [98], [99], [102], [107], [116], [125], [126] |
| Social benefits | Circular economy practices generate employment, entrepreneurship, and skill development opportunities—particularly in repair, refurbishment, and recycling sectors—fostering inclusive economic growth and community-level resilience | [11], [12], [17], [35], [48], [56], [82], [91], [93], [112] |
| Technology advancements | Emerging technologies—such as digital tracking, automation, and advanced material processing—enhance the efficiency, traceability, and scalability of circular practices, enabling producers and intermediaries to implement circular models more effectively across the value chain. (See supplementary table 4 for detailed list of technologies covered by literature) | [12], [34], [35], [37], [46], [51], [58], [66], [72], [77], [95], [100], [118], [127], [128], [129] |

# **Supplementary Table S4. Emerging and digital technologies identified in the reviewed literature and their roles in enabling circular economy strategies in the EEE sector**

Description: This table provides an overview of emerging and digital technologies identified in the literature, including identification and traceability tools, automation systems, data-driven decision technologies, and digital platforms. It summarises their roles in supporting circular economy strategies, particularly in improving traceability, reducing uncertainty, enabling lifecycle coordination, and supporting repair, reuse, and recycling pathways.

| Category | Technology | Summary | Cited In |
| --- | --- | --- | --- |
| Automation & Operations | Robotics | Robotics can improve the efficiency, speed, and safety of circular economy operations such as sorting, dismantling, disassembly, and recycling. They are especially valuable in handling complex or hazardous electronic waste streams. By increasing process consistency and recovery precision, robotics can improve the economic and environmental performance of circular systems. | [58], [63], [71], [77], [100], [130] |
| Human-Robot Collaboration | Human-robot collaboration combines human judgment and dexterity with robotic precision and repeatability. In circular economy settings, this is useful for tasks like repair, disassembly, inspection, and component recovery, where full automation may be difficult. It can improve worker safety, operational flexibility, and resource recovery while keeping humans involved in higher-value decisions. | [33], [58], [77], [100], [130], [131] |
| Identification and Traceability Technologies | Digital Product Passports | Digital Product Passports help circular economy systems by storing and sharing information on a product’s composition, origin, repair history, and end-of-life options. This improves transparency across value chains and helps actors make better decisions about reuse, repair, refurbishment, and recycling. They can also support compliance, traceability, and coordination between manufacturers, service providers, recyclers, and consumers. | [6], [17], [51], [57], [58], [59], [66], [70], [72], [74], [117], [125], [132] |
| Product Identification (RFID, QR, SNR) | Product identification technologies such as RFID tags, QR codes, and serial numbers make individual products and components easier to recognize and track. In a circular economy, this supports sorting, return flows, authentication, maintenance, and reverse logistics. These tools are especially useful for linking physical products to digital records and enabling traceable product journeys. | [43], [52], [56], [95], [119], [124], [133] |
| Sensor Technologies | Sensor technologies help monitor the condition, usage, and performance of products and components over time. This can extend product life by enabling predictive maintenance, timely repair, and condition-based decision-making. In circular systems, sensors also help identify when products are suitable for reuse, refurbishment, remanufacturing, or material recovery. | [34], [74], [77], [95], [108], [120], [124], [127] |
| Internet of Things | The Internet of Things connects products and assets through networks that enable real-time data collection and communication. In circular economy systems, IoT improves traceability, supports lifecycle monitoring, and enables smarter reverse logistics and asset management. It helps organizations move from reactive to data-driven circular strategies. | [6], [12], [59], [72], [104], [118], [119], [124] |
| Intelligent Data and Decision Technologies | AI, ML, NLP | AI, machine learning, and natural language processing help circular economy actors analyze large amounts of product, market, and operational data. They can support forecasting, automated classification, return prediction, product assessment, and decision-making across circular value chains. These technologies help make circular systems more adaptive, efficient, and scalable. | [31], [58], [63], [77], [109], [134] |
| Digital Twins | Digital twins create virtual representations of products, components, or systems that can be used to simulate condition, use, and performance over time. In a circular economy, they help evaluate maintenance needs, remaining useful life, upgrade opportunities, and end-of-life scenarios. This supports more informed decisions about product life extension and resource recovery. | [24], [31], [56], [59], [72], [74], [95], [101], [104], [106], [120], [124], [135] |
| Platform & Exchange technologies | Platforms and Marketplaces | Platforms and marketplaces help connect buyers, sellers, repair actors, refurbishers, recyclers, and service providers. In a circular economy, they enable the exchange of used, repaired, refurbished, or remanufactured products and make circular options more visible and accessible to consumers. They also support ecosystem coordination by reducing transaction barriers and improving market participation. | [1], [6], [8], [10], [11], [13], [15], [26], [31], [38], [41], [43], [56], [72], [90], [95], [101], [110], [135], [136] |

# **Supplementary References. References cited in supplementary tables S2-S4**

[1] R. Mugge, W. De Jong, O. Person, and E. J. Hultink, ‘“If It Ain’t Broke, Don’t Explain It”: The Influence of Visual and Verbal Information about Prior Use on Consumers’ Evaluations of Refurbished Electronics’, *Des. J.*, vol. 21, no. 4, pp. 499–520, Jul. 2018, doi: 10.1080/14606925.2018.1472856.

[2] K. Parajuly, C. Fitzpatrick, O. Muldoon, and R. Kuehr, ‘Behavioral change for the circular economy: A review with focus on electronic waste management in the EU’, *Resour. Conserv. Recycl. X*, vol. 6, p. 100035, May 2020, doi: 10.1016/j.rcrx.2020.100035.

[3] A. T. H. Kuah and P. Wang, ‘Circular economy and consumer acceptance: An exploratory study in East and Southeast Asia’, *J. Clean. Prod.*, vol. 247, p. 119097, Feb. 2020, doi: 10.1016/j.jclepro.2019.119097.

[4] F. Corsini, N. M. Gusmerotti, and M. Frey, ‘Consumer’s Circular Behaviors in Relation to the Purchase, Extension of Life, and End of Life Management of Electrical and Electronic Products: A Review’, *Sustainability*, vol. 12, no. 24, p. 10443, Dec. 2020, doi: 10.3390/su122410443.

[5] V. Rizos and J. Bryhn, ‘Implementation of circular economy approaches in the electrical and electronic equipment (EEE) sector: Barriers, enablers and policy insights’, *J. Clean. Prod.*, vol. 338, p. 130617, Mar. 2022, doi: 10.1016/j.jclepro.2022.130617.

[6] I. Gåvertsson, L. Milios, and C. Dalhammar, ‘Quality Labelling for Re-used ICT Equipment to Support Consumer Choice in the Circular Economy’, *J. Consum. Policy*, vol. 43, no. 2, pp. 353–377, Jun. 2020, doi: 10.1007/s10603-018-9397-9.

[7] M. Sonego, M. E. S. Echeveste, and H. G. Debarba, ‘Repair of electronic products: Consumer practices and institutional initiatives’, *Sustain. Prod. Consum.*, vol. 30, pp. 556–565, Mar. 2022, doi: 10.1016/j.spc.2021.12.031.

[8] Y.-Y. Chun, M. Matsumoto, K. Chinen, H. Endo, S.-S. Gan, and K. Tahara, ‘What will lead Asian consumers into circular consumption? An empirical study of purchasing refurbished smartphones in Japan and Indonesia’, *Sustain. Prod. Consum.*, vol. 33, pp. 158–167, Sep. 2022, doi: 10.1016/j.spc.2022.06.015.

[9] S. O. May and B. Steuer, ‘Electrical and electronic equipment repair in a circular economy: Investigating consumer behaviour in Hong Kong’, *Resour. Conserv. Recycl.*, vol. 215, p. 108036, Apr. 2025, doi: 10.1016/j.resconrec.2024.108036.

[10] C. Clemm, M. Matsumoto, K. Chinen, Y.-Y. Chun, and M. Romadona, ‘Circular economy in practice: The influence of second-hand stores on used electronics consumption in Japan and Germany’, *J. Clean. Prod.*, vol. 527, p. 146717, Oct. 2025, doi: 10.1016/j.jclepro.2025.146717.

[11] M. Van Der Velden, E. Maitre-Ekern, and D. K. Wanja, ‘The Role of Independent Repair in a Circular and Regenerative Economy’, *Circ. Econ. Sustain.*, vol. 4, no. 4, pp. 2981–3006, Dec. 2024, doi: 10.1007/s43615-023-00304-y.

[12] S. B. G. Da Silva, M. V. Barros, J. Â. Z. Radicchi, F. N. Puglieri, and C. M. Piekarski, ‘Opportunities and challenges to increase circularity in the product’s use phase’, *Sustain. Futur.*, vol. 8, p. 100297, Dec. 2024, doi: 10.1016/j.sftr.2024.100297.

[13] M. T. Islam *et al.*, ‘A global review of consumer behavior towards e-waste and implications for the circular economy’, *J. Clean. Prod.*, vol. 316, p. 128297, Sep. 2021, doi: 10.1016/j.jclepro.2021.128297.

[14] X. Pan, C. W. Y. Wong, and C. Li, ‘Circular economy practices in the waste electrical and electronic equipment (WEEE) industry: A systematic review and future research agendas’, *J. Clean. Prod.*, vol. 365, p. 132671, Sep. 2022, doi: 10.1016/j.jclepro.2022.132671.

[15] N. Koshta, S. Patra, and S. P. Singh, ‘Sharing economic responsibility: Assessing end user’s willingness to support E-waste reverse logistics for circular economy’, *J. Clean. Prod.*, vol. 332, p. 130057, Jan. 2022, doi: 10.1016/j.jclepro.2021.130057.

[16] B. Steuer, ‘What Institutional Dynamics Guide Waste Electrical and Electronic Equipment Refurbishment and Reuse in Urban China?’, *Recycling*, vol. 1, no. 2, pp. 286–310, Sep. 2016, doi: 10.3390/recycling1020286.

[17] D. Purkiss, P. Pencheva, B. Munro, and M. Miodownik, ‘A systems approach to growing the UK electronics and appliance repair economy’, *Front. Sustain.*, vol. 5, p. 1432655, Sep. 2024, doi: 10.3389/frsus.2024.1432655.

[18] L. H. Xavier, M. Ottoni, and J. Lepawsky, ‘Circular economy and e-waste management in the Americas: Brazilian and Canadian frameworks’, *J. Clean. Prod.*, vol. 297, p. 126570, May 2021, doi: 10.1016/j.jclepro.2021.126570.

[19] B. Bridgens, K. Hobson, D. Lilley, J. Lee, J. L. Scott, and G. T. Wilson, ‘Closing the Loop on E‐waste: A Multidisciplinary Perspective’, *J. Ind. Ecol.*, vol. 23, no. 1, pp. 169–181, Feb. 2019, doi: 10.1111/jiec.12645.

[20] R. Hischier and H. W. Böni, ‘Combining environmental and economic factors to evaluate the reuse of electrical and electronic equipment – a Swiss case study’, *Resour. Conserv. Recycl.*, vol. 166, p. 105307, Mar. 2021, doi: 10.1016/j.resconrec.2020.105307.

[21] O.-C. Modoi and F.-C. Mihai, ‘E-Waste and End-of-Life Vehicles Management and Circular Economy Initiatives in Romania’, *Energies*, vol. 15, no. 3, p. 1120, Feb. 2022, doi: 10.3390/en15031120.

[22] O. S. Shittu, I. D. Williams, and P. J. Shaw, ‘Global E-waste management: Can WEEE make a difference? A review of e-waste trends, legislation, contemporary issues and future challenges’, *Waste Manag.*, vol. 120, pp. 549–563, Feb. 2021, doi: 10.1016/j.wasman.2020.10.016.

[23] F. Tesfaye, D. Lindberg, J. Hamuyuni, P. Taskinen, and L. Hupa, ‘Improving urban mining practices for optimal recovery of resources from e-waste’, *Miner. Eng.*, vol. 111, pp. 209–221, Sep. 2017, doi: 10.1016/j.mineng.2017.06.018.

[24] S. Glöser-Chahoud, M. Pfaff, R. Walz, and F. Schultmann, ‘Simulating the service lifetimes and storage phases of consumer electronics in Europe with a cascade stock and flow model’, *J. Clean. Prod.*, vol. 213, pp. 1313–1321, Mar. 2019, doi: 10.1016/j.jclepro.2018.12.244.

[25] M. T. Islam, P. Dias, and N. Huda, ‘Waste mobile phones: A survey and analysis of the awareness, consumption and disposal behavior of consumers in Australia’, *J. Environ. Manage.*, vol. 275, p. 111111, Dec. 2020, doi: 10.1016/j.jenvman.2020.111111.

[26] T. Hunger, M. Arnold, and M. Ulber, ‘Circular value chain blind spot – A scoping review of the 9R framework in consumption’, *J. Clean. Prod.*, vol. 440, p. 140853, Feb. 2024, doi: 10.1016/j.jclepro.2024.140853.

[27] C. Cole, A. Gnanapragasam, T. Cooper, and J. Singh, ‘An assessment of achievements of the WEEE Directive in promoting movement up the waste hierarchy: experiences in the UK’, *Waste Manag.*, vol. 87, pp. 417–427, Mar. 2019, doi: 10.1016/j.wasman.2019.01.046.

[28] Y. Kazançoglu, E. Ada, Y. Ozturkoglu, and M. Ozbiltekin, ‘Analysis of the barriers to urban mining for resource melioration in emerging economies’, *Resour. Policy*, vol. 68, p. 101768, Oct. 2020, doi: 10.1016/j.resourpol.2020.101768.

[29] S. Svensson-Hoglund, J. L. Richter, E. Maitre-Ekern, J. D. Russell, T. Pihlajarinne, and C. Dalhammar, ‘Barriers, enablers and market governance: A review of the policy landscape for repair of consumer electronics in the EU and the U.S.’, *J. Clean. Prod.*, vol. 288, p. 125488, Mar. 2021, doi: 10.1016/j.jclepro.2020.125488.

[30] A. Işıldar, E. R. Rene, E. D. Van Hullebusch, and P. N. L. Lens, ‘Electronic waste as a secondary source of critical metals: Management and recovery technologies’, *Resour. Conserv. Recycl.*, vol. 135, pp. 296–312, Aug. 2018, doi: 10.1016/j.resconrec.2017.07.031.

[31] M. M. Kamal *et al.*, ‘Immediate return in circular economy: Business to consumer product return information sharing framework to support sustainable manufacturing in small and medium enterprises’, *J. Bus. Res.*, vol. 151, pp. 379–396, Nov. 2022, doi: 10.1016/j.jbusres.2022.06.021.

[32] R. Nithya, C. Sivasankari, and A. Thirunavukkarasu, ‘Electronic waste generation, regulation and metal recovery: a review’, *Environ. Chem. Lett.*, vol. 19, no. 2, pp. 1347–1368, Apr. 2021, doi: 10.1007/s10311-020-01111-9.

[33] M. Sharma, S. Joshi, and K. Govindan, ‘Issues and solutions of electronic waste urban mining for circular economy transition: An Indian context’, *J. Environ. Manage.*, vol. 290, p. 112373, Jul. 2021, doi: 10.1016/j.jenvman.2021.112373.

[34] T. Shevchenko, M. Saidani, Y. Danko, I. Golysheva, J. Chovancová, and R. Vavrek, ‘Towards a Smart E-Waste System Utilizing Supply Chain Participants and Interactive Online Maps’, *Recycling*, vol. 6, no. 1, p. 8, Feb. 2021, doi: 10.3390/recycling6010008.

[35] O. B. Abogunrin‐Olafisoye, O. Adeyi, A. J. Adeyi, E. O. Oke, and G. O. Ojediran, ‘Sustainable Waste Electrical and Electronics Equipment Recycling in Nigeria, Policies and Emerging Technologies’, *Environ. Qual. Manag.*, vol. 34, no. 3, p. e70020, Mar. 2025, doi: 10.1002/tqem.70020.

[36] A. J. C. Correia *et al.*, ‘Evaluation of circular economy practices for management of the reverse chain of electronic waste in Brazil’, *J. Mater. Cycles Waste Manag.*, vol. 26, no. 6, pp. 3699–3713, Nov. 2024, doi: 10.1007/s10163-024-02071-w.

[37] V. Kumar and O. J. Shukla, ‘Unravelling sustainable impediments in E-waste supply chain management: A Fuzzy-WINGS decision approach’, *J. Environ. Manage.*, vol. 389, p. 126208, Aug. 2025, doi: 10.1016/j.jenvman.2025.126208.

[38] P. S. Karagiannopoulos, N. M. Manousakis, and C. S. Psomopoulos, ‘“3R” Practices Focused on Home Appliances Sector in Terms of Green Consumerism: Principles, Technical Dimensions, and Future Challenges’, *IEEE Trans. Consum. Electron.*, vol. 70, no. 1, pp. 96–107, Feb. 2024, doi: 10.1109/TCE.2023.3318874.

[39] E. G. Hansen and F. Revellio, ‘Circular value creation architectures: Make, ally, buy, or laissez‐faire’, *J. Ind. Ecol.*, vol. 24, no. 6, pp. 1250–1273, Dec. 2020, doi: 10.1111/jiec.13016.

[40] D. Franquesa and L. Navarro, ‘Devices as a commons: limits to premature recycling’, in *Proceedings of the 2018 Workshop on Computing within Limits*, Toronto Ontario Canada: ACM, May 2018, pp. 1–10. doi: 10.1145/3232617.3232624.

[41] M. Cordella, F. Alfieri, C. Clemm, and A. Berwald, ‘Durability of smartphones: A technical analysis of reliability and repairability aspects’, *J. Clean. Prod.*, vol. 286, p. 125388, Mar. 2021, doi: 10.1016/j.jclepro.2020.125388.

[42] E. Mohammadi, S. J. Singh, and K. Habib, ‘Electronic waste in the Caribbean: An impending environmental disaster or an opportunity for a circular economy?’, *Resour. Conserv. Recycl.*, vol. 164, p. 105106, Jan. 2021, doi: 10.1016/j.resconrec.2020.105106.

[43] N. T. Hong Nham and L. T. Ha, ‘Making the circular economy digital or the digital economy circular? Empirical evidence from the European region’, *Technol. Soc.*, vol. 70, p. 102023, Aug. 2022, doi: 10.1016/j.techsoc.2022.102023.

[44] K. Parajuly and H. Wenzel, ‘Potential for circular economy in household WEEE management’, *J. Clean. Prod.*, vol. 151, pp. 272–285, May 2017, doi: 10.1016/j.jclepro.2017.03.045.

[45] I. D’Adamo, F. Ferella, M. Gastaldi, F. Maggiore, P. Rosa, and S. Terzi, ‘Towards sustainable recycling processes: Wasted printed circuit boards as a source of economic opportunities’, *Resour. Conserv. Recycl.*, vol. 149, pp. 455–467, Oct. 2019, doi: 10.1016/j.resconrec.2019.06.012.

[46] W. Kanciak, M. Popławski, and P. Golińska-Dawson, ‘Assessment of the potential for remanufacturing of a washing machine with focus on critical raw materials’, *IFAC-Pap.*, vol. 59, no. 24, pp. 305–310, 2025, doi: 10.1016/j.ifacol.2025.11.882.

[47] I. Ruiz De Azua Lahidalga, E. Mendiburu-Valor, D. Justel, and J. M. F. Mendoza, ‘Circular electronics: exploring the applicability of circularity and environmental sustainability criteria in power electronics’, *Results Eng.*, vol. 26, p. 105199, Jun. 2025, doi: 10.1016/j.rineng.2025.105199.

[48] S. El Jalbout and S. Keivanpour, ‘Development of a body of knowledge for design for disassembly and recycling of high-tech products: a case study on lithium-ion batteries’, *J. Ind. Prod. Eng.*, vol. 41, no. 1, pp. 19–39, Jan. 2024, doi: 10.1080/21681015.2023.2262467.

[49] D. Guzzo, V. P. Rodrigues, D. C. A. Pigosso, and J. Mascarenhas, ‘Analysis of national policies for Circular Economy transitions: Modelling and simulating the Brazilian industrial agreement for electrical and electronic equipment’, *Waste Manag.*, vol. 138, pp. 59–74, Feb. 2022, doi: 10.1016/j.wasman.2021.11.017.

[50] A. Appolloni, I. D’Adamo, M. Gastaldi, E. D. R. Santibanez-Gonzalez, and D. Settembre-Blundo, ‘Growing e-waste management risk awareness points towards new recycling scenarios: The view of the Big Four’s youngest consultants’, *Environ. Technol. Innov.*, vol. 23, p. 101716, Aug. 2021, doi: 10.1016/j.eti.2021.101716.

[51] H. Jin *et al.*, ‘Life cycle assessment of emerging technologies on value recovery from hard disk drives’, *Resour. Conserv. Recycl.*, vol. 157, p. 104781, Jun. 2020, doi: 10.1016/j.resconrec.2020.104781.

[52] M. T. Islam and N. Huda, ‘Material flow analysis (MFA) as a strategic tool in E-waste management: Applications, trends and future directions’, *J. Environ. Manage.*, vol. 244, pp. 344–361, Aug. 2019, doi: 10.1016/j.jenvman.2019.05.062.

[53] K. Crafoord, C. Dalhammar, and L. Milios, ‘The use of public procurement to incentivize longer lifetime and remanufacturing of computers’, *Procedia CIRP*, vol. 73, pp. 137–141, 2018, doi: 10.1016/j.procir.2018.03.316.

[54] C.-H. Lin, Y. Chen, K.-I. Chang, and P.-Y. Chi, ‘The evaluation of economic impact of the Basel Convention on the trade of waste electrical and electronic equipment’, *J. Asian Econ.*, vol. 100, p. 101996, Oct. 2025, doi: 10.1016/j.asieco.2025.101996.

[55] N. Kunz, K. Mayers, and L. N. Van Wassenhove, ‘Stakeholder Views on Extended Producer Responsibility and the Circular Economy’, *Calif. Manage. Rev.*, vol. 60, no. 3, pp. 45–70, May 2018, doi: 10.1177/0008125617752694.

[56] G. Bressanelli, N. Saccani, and M. Perona, ‘Are digital servitization-based Circular Economy business models sustainable? A systemic what-if simulation model’, *J. Clean. Prod.*, vol. 458, p. 142512, Jun. 2024, doi: 10.1016/j.jclepro.2024.142512.

[57] O. Alatise, R. Wu, A. Deb, and J. Ortiz Gonzalez, ‘Second life potential of electric vehicle power electronics for more circular economies’, *Renew. Sustain. Energy Rev.*, vol. 210, p. 115238, Mar. 2025, doi: 10.1016/j.rser.2024.115238.

[58] Frank Stiksma, Marten van Sinderen, and João Luiz Rebelo Moreira, ‘Value Assessment of Consumer Electronics with Digital Product Passports: A Case Study of Lifetime Extension Assessment of Disposed Washing Machines’, in *Enterprise Design, Operations, and Computing - 28th International Conference, EDOC 2024, Revised Selected Papers*, vol. 15409 LNCS, in Lecture Notes in Computer Science (including subseries Lecture Notes in Artificial Intelligence and Lecture Notes in Bioinformatics), vol. 15409 LNCS. , Vienna: Springer, 2024, pp. 81–98. doi: 10.1007/978-3-031-78338-8_5.

[59] P. Tecchio, F. Ardente, and F. Mathieux, ‘Understanding lifetimes and failure modes of defective washing machines and dishwashers’, *J. Clean. Prod.*, vol. 215, pp. 1112–1122, Apr. 2019, doi: 10.1016/j.jclepro.2019.01.044.

[60] K. Schmidtseifer, L. C. Apolte, and P. Gust, ‘Development of a model for assessing the repairability of products in the concept phase’, in *2025 IEEE Conference on Technologies for Sustainability (SusTech)*, Los Angeles, CA, USA: IEEE, Apr. 2025, pp. 1–8. doi: 10.1109/SusTech63138.2025.11025689.

[61] P. S. Karagiannopoulos, N. M. Manousakis, and C. S. Psomopoulos, ‘Repair and recycling of PCBs and their components based on obsolescence index: a domestic electrical appliances case study’, *Environ. Sci. Pollut. Res.*, vol. 31, no. 12, pp. 17546–17564, Jan. 2023, doi: 10.1007/s11356-022-25077-z.

[62] T. Andersen, ‘A comparative study of national variations of the European WEEE directive: manufacturer’s view’, *Environ. Sci. Pollut. Res.*, vol. 29, no. 14, pp. 19920–19939, Mar. 2022, doi: 10.1007/s11356-021-13206-z.

[63] T. A. Kurniawan *et al.*, ‘Decarbonization in waste recycling industry using digitalization to promote net-zero emissions and its implications on sustainability’, *J. Environ. Manage.*, vol. 338, p. 117765, Jul. 2023, doi: 10.1016/j.jenvman.2023.117765.

[64] R. Isernia, R. Passaro, I. Quinto, and A. Thomas, ‘The Reverse Supply Chain of the E-Waste Management Processes in a Circular Economy Framework: Evidence from Italy’, *Sustainability*, vol. 11, no. 8, p. 2430, Apr. 2019, doi: 10.3390/su11082430.

[65] B. Mayanti and P. Helo, ‘Circular economy through waste reverse logistics under extended producer responsibility in Finland’, *Waste Manag. Res. J. Sustain. Circ. Econ.*, vol. 42, no. 1, pp. 59–73, Jan. 2024, doi: 10.1177/0734242X231168801.

[66] F. Stiksma, M. Van Sinderen, and J. L. Rebelo Moreira, ‘Digital Product Passport adoption in the Electrical and Electronic Equipment sector:a socio-technical transition perspective’, *IFAC-Pap.*, vol. 59, no. 10, pp. 488–493, 2025, doi: 10.1016/j.ifacol.2025.09.084.

[67] L. H. Xavier, M. Ottoni, and L. P. P. Abreu, ‘A comprehensive review of urban mining and the value recovery from e-waste materials’, *Resour. Conserv. Recycl.*, vol. 190, p. 106840, Mar. 2023, doi: 10.1016/j.resconrec.2022.106840.

[68] D. Sengupta, I. M. S. K. Ilankoon, K. Dean Kang, and M. Nan Chong, ‘Circular economy and household e-waste management in India: Integration of formal and informal sectors’, *Miner. Eng.*, vol. 184, p. 107661, Jun. 2022, doi: 10.1016/j.mineng.2022.107661.

[69] S. Singh *et al.*, ‘Thematic exploration of sectoral and cross-cutting challenges to circular economy implementation’, *Clean Technol. Environ. Policy*, vol. 23, no. 3, pp. 915–936, Apr. 2021, doi: 10.1007/s10098-020-02016-5.

[70] V. Olivero-Ortiz, J. C. M. Polo, I. Oliveros, and C. Robles-Algarín, ‘From E-Waste to Second Life Batteries: Unsupervised Grouping of Reused 18650 Cells Using K-Means and Silhouette Analysis’, in *2025 IEEE Technology and Engineering Management Society (TEMSCON LATAM)*, Cartagena, Colombia: IEEE, Jun. 2025, pp. 1–6. doi: 10.1109/TEMSCONLATAM65810.2025.11238721.

[71] J. Vogt Duberg, G. Johansson, E. Sundin, and J. Kurilova-Palisaitiene, ‘Prerequisite factors for original equipment manufacturer remanufacturing’, *J. Clean. Prod.*, vol. 270, p. 122309, Oct. 2020, doi: 10.1016/j.jclepro.2020.122309.

[72] A. Paolucci, M. Gianvincenzi, M. Marconi, C. Favi, and D. Pennino, ‘Development of a Decentralized Digital Product Passport for Enhanced Lifecycle Management of Electrical and Electronic Equipment’, *Procedia CIRP*, vol. 135, pp. 356–361, 2025, doi: 10.1016/j.procir.2024.12.030.

[73] M. Shahabuddin *et al.*, ‘A review of the recent development, challenges, and opportunities of electronic waste (e-waste)’, *Int. J. Environ. Sci. Technol.*, vol. 20, no. 4, pp. 4513–4520, Apr. 2023, doi: 10.1007/s13762-022-04274-w.

[74] R. Casper and E. Sundin, ‘Addressing Today’s challenges in automotive remanufacturing’, *J. Remanufacturing*, vol. 8, no. 3, pp. 93–102, Oct. 2018, doi: 10.1007/s13243-018-0047-9.

[75] T. Huang, J. Zhu, X. Huang, J. Ruan, and Z. Xu, ‘Assessment of precious metals positioning in waste printed circuit boards and the economic benefits of recycling’, *Waste Manag.*, vol. 139, pp. 105–115, Feb. 2022, doi: 10.1016/j.wasman.2021.12.030.

[76] A. Singh, R. Panchal, and M. Naik, ‘Circular economy potential of e-waste collectors, dismantlers, and recyclers of Maharashtra: a case study’, *Environ. Sci. Pollut. Res.*, vol. 27, no. 17, pp. 22081–22099, Jun. 2020, doi: 10.1007/s11356-020-08320-3.

[77] T. Tolio *et al.*, ‘Design, management and control of demanufacturing and remanufacturing systems’, *CIRP Ann.*, vol. 66, no. 2, pp. 585–609, 2017, doi: 10.1016/j.cirp.2017.05.001.

[78] Z. Zhang, M. Z. Malik, A. Khan, N. Ali, S. Malik, and M. Bilal, ‘Environmental impacts of hazardous waste, and management strategies to reconcile circular economy and eco-sustainability’, *Sci. Total Environ.*, vol. 807, p. 150856, Feb. 2022, doi: 10.1016/j.scitotenv.2021.150856.

[79] I. Deviatkin, S. Rousu, M. Ghoreishi, M. Naji Nassajfar, M. Horttanainen, and V. Leminen, ‘Implementation of Circular Economy Strategies within the Electronics Sector: Insights from Finnish Companies’, *Sustainability*, vol. 14, no. 6, p. 3268, Mar. 2022, doi: 10.3390/su14063268.

[80] K. Yanamandra, D. Pinisetty, A. Daoud, and N. Gupta, ‘Recycling of Li-Ion and Lead Acid Batteries: A Review’, *J. Indian Inst. Sci.*, vol. 102, no. 1, pp. 281–295, Jan. 2022, doi: 10.1007/s41745-021-00269-7.

[81] D. H. Dang *et al.*, ‘Toward the Circular Economy of Rare Earth Elements: A Review of Abundance, Extraction, Applications, and Environmental Impacts’, *Arch. Environ. Contam. Toxicol.*, vol. 81, no. 4, pp. 521–530, Nov. 2021, doi: 10.1007/s00244-021-00867-7.

[82] M. T. Islam and N. Huda, ‘E-waste in Australia: Generation estimation and untapped material recovery and revenue potential’, *J. Clean. Prod.*, vol. 237, p. 117787, Nov. 2019, doi: 10.1016/j.jclepro.2019.117787.

[83] H. B. Sharma, K. R. Vanapalli, B. Samal, V. R. S. Cheela, B. K. Dubey, and J. Bhattacharya, ‘Circular economy approach in solid waste management system to achieve UN-SDGs: Solutions for post-COVID recovery’, *Sci. Total Environ.*, vol. 800, p. 149605, Dec. 2021, doi: 10.1016/j.scitotenv.2021.149605.

[84] P. Vanegas *et al.*, ‘Ease of disassembly of products to support circular economy strategies’, *Resour. Conserv. Recycl.*, vol. 135, pp. 323–334, Aug. 2018, doi: 10.1016/j.resconrec.2017.06.022.

[85] A. Alkouh, K. A. Keddar, and S. Alatefi, ‘Revolutionizing Repairability of Industrial Electronics in Oil and Gas Sector: A Mathematical Model for the Index of Repairability (IOR) as a Novel Technique’, *Electronics*, vol. 12, no. 11, p. 2461, May 2023, doi: 10.3390/electronics12112461.

[86] S. D. J. López Pérez, ‘Modelos de negocio circulares para el Sector Eléctrico y Electrónico y RAEE. Medidas para su difusión e implementación en México’, *Rev. Galega Econ.*, pp. 1–23, Apr. 2024, doi: 10.15304/rge.33.2.9455.

[87] M. Ottoni, P. Dias, and L. H. Xavier, ‘A circular approach to the e-waste valorization through urban mining in Rio de Janeiro, Brazil’, *J. Clean. Prod.*, vol. 261, p. 120990, Jul. 2020, doi: 10.1016/j.jclepro.2020.120990.

[88] M. P. O’Connor, J. B. Zimmerman, P. T. Anastas, and D. L. Plata, ‘A Strategy for Material Supply Chain Sustainability: Enabling a Circular Economy in the Electronics Industry through Green Engineering’, *ACS Sustain. Chem. Eng.*, vol. 4, no. 11, pp. 5879–5888, Nov. 2016, doi: 10.1021/acssuschemeng.6b01954.

[89] R. Bleischwitz *et al.*, ‘The circular economy in China: Achievements, challenges and potential implications for decarbonisation’, *Resour. Conserv. Recycl.*, vol. 183, p. 106350, Aug. 2022, doi: 10.1016/j.resconrec.2022.106350.

[90] G. Anandh, S. PrasannaVenkatesan, M. Goh, and K. Mathiyazhagan, ‘Reuse assessment of WEEE: Systematic review of emerging themes and research directions’, *J. Environ. Manage.*, vol. 287, p. 112335, Jun. 2021, doi: 10.1016/j.jenvman.2021.112335.

[91] C. Ramprasad *et al.*, ‘Strategies and options for the sustainable recovery of rare earth elements from electrical and electronic waste’, *Chem. Eng. J.*, vol. 442, p. 135992, Aug. 2022, doi: 10.1016/j.cej.2022.135992.

[92] S. Althaf, C. W. Babbitt, and R. Chen, ‘The evolution of consumer electronic waste in the United States’, *J. Ind. Ecol.*, vol. 25, no. 3, pp. 693–706, Jun. 2021, doi: 10.1111/jiec.13074.

[93] L. H. Xavier, E. C. Giese, A. C. Ribeiro-Duthie, and F. A. F. Lins, ‘Sustainability and the circular economy: A theoretical approach focused on e-waste urban mining’, *Resour. Policy*, vol. 74, p. 101467, Dec. 2021, doi: 10.1016/j.resourpol.2019.101467.

[94] S. K. Sandwal, R. Jakhar, and K. Styszko, ‘E-Waste Challenges in India: Environmental and Human Health Impacts’, *Appl. Sci.*, vol. 15, no. 8, p. 4350, Apr. 2025, doi: 10.3390/app15084350.

[95] D. Franquesa, L. Navarro, and X. Bustamante, ‘A circular commons for digital devices: tools and services in ereuse.org’, in *Proceedings of the Second Workshop on Computing within Limits*, Irvine California: ACM, Jun. 2016, pp. 1–9. doi: 10.1145/2926676.2926684.

[96] V. Murthy and S. Ramakrishna, ‘A Review on Global E-Waste Management: Urban Mining towards a Sustainable Future and Circular Economy’, *Sustainability*, vol. 14, no. 2, p. 647, Jan. 2022, doi: 10.3390/su14020647.

[97] M. Sharma, S. Joshi, and A. Kumar, ‘Assessing enablers of e-waste management in circular economy using DEMATEL method: An Indian perspective’, *Environ. Sci. Pollut. Res.*, vol. 27, no. 12, pp. 13325–13338, Apr. 2020, doi: 10.1007/s11356-020-07765-w.

[98] J. Levänen, T. Lyytinen, and S. Gatica, ‘Modelling the Interplay Between Institutions and Circular Economy Business Models: A Case Study of Battery Recycling in Finland and Chile’, *Ecol. Econ.*, vol. 154, pp. 373–382, Dec. 2018, doi: 10.1016/j.ecolecon.2018.08.018.

[99] G. Gaustad, M. Krystofik, M. Bustamante, and K. Badami, ‘Circular economy strategies for mitigating critical material supply issues’, *Resour. Conserv. Recycl.*, vol. 135, pp. 24–33, Aug. 2018, doi: 10.1016/j.resconrec.2017.08.002.

[100] E. Alvarez-de-los-Mozos and A. Renteria, ‘Collaborative Robots in e-waste Management’, *Procedia Manuf.*, vol. 11, pp. 55–62, 2017, doi: 10.1016/j.promfg.2017.07.133.

[101] D. Choudhary, F. H. Qaiser, A. Choudhary, and K. Fernandes, ‘A model for managing returns in a circular economy context: A case study from the Indian electronics industry’, *Int. J. Prod. Econ.*, vol. 249, p. 108505, Jul. 2022, doi: 10.1016/j.ijpe.2022.108505.

[102] L. Talens Peiró, F. Ardente, and F. Mathieux, ‘Design for Disassembly Criteria in EU Product Policies for a More Circular Economy: A Method for Analyzing Battery Packs in PC‐Tablets and Subnotebooks’, *J. Ind. Ecol.*, vol. 21, no. 3, pp. 731–741, Jun. 2017, doi: 10.1111/jiec.12608.

[103] F. O. Ongondo, I. D. Williams, and G. Whitlock, ‘Distinct Urban Mines: Exploiting secondary resources in unique anthropogenic spaces’, *Waste Manag.*, vol. 45, pp. 4–9, Nov. 2015, doi: 10.1016/j.wasman.2015.05.026.

[104] F. Wang, L. Yu, and A. Wu, ‘Forecasting the electronic waste quantity with a decomposition-ensemble approach’, *Waste Manag.*, vol. 120, pp. 828–838, Feb. 2021, doi: 10.1016/j.wasman.2020.11.006.

[105] A. K. Awasthi *et al.*, ‘Modelling the correlations of e-waste quantity with economic increase’, *Sci. Total Environ.*, vol. 613–614, pp. 46–53, Feb. 2018, doi: 10.1016/j.scitotenv.2017.08.288.

[106] X. Schepler, N. Absi, and A. Jeanjean, ‘Refurbishment and remanufacturing planning model for pre-owned consumer electronics’, *Int. J. Prod. Res.*, vol. 62, no. 7, pp. 2499–2521, Apr. 2024, doi: 10.1080/00207543.2023.2218942.

[107] M. T. Islam and N. Huda, ‘Reverse logistics and closed-loop supply chain of Waste Electrical and Electronic Equipment (WEEE)/E-waste: A comprehensive literature review’, *Resour. Conserv. Recycl.*, vol. 137, pp. 48–75, Oct. 2018, doi: 10.1016/j.resconrec.2018.05.026.

[108] T. Turkbay Romano *et al.*, ‘Disassemblability Assessment of Power Electronic Converters for Improved Circularity’, *Sustainability*, vol. 16, no. 11, p. 4712, May 2024, doi: 10.3390/su16114712.

[109] M. H. Shahidzadeh and S. Shokouhyar, ‘Shedding light on the reverse logistics’ decision-making: a social-media analytics study of the electronics industry in developing vs developed countries’, *Int. J. Sustain. Eng.*, vol. 15, no. 1, pp. 161–176, Dec. 2022, doi: 10.1080/19397038.2022.2101706.

[110] S. Agrawal and R. K. Singh, ‘Analyzing disposition decisions for sustainable reverse logistics: Triple Bottom Line approach’, *Resour. Conserv. Recycl.*, vol. 150, p. 104448, Nov. 2019, doi: 10.1016/j.resconrec.2019.104448.

[111] N. R. Misra, S. Kumar, and A. Jain, ‘A Review on E-waste: Fostering the Need for Green Electronics’, in *2021 International Conference on Computing, Communication, and Intelligent Systems (ICCCIS)*, Greater Noida, India: IEEE, Feb. 2021, pp. 1032–1036. doi: 10.1109/ICCCIS51004.2021.9397191.

[112] S. Abalansa, B. El Mahrad, J. Icely, and A. Newton, ‘Electronic Waste, an Environmental Problem Exported to Developing Countries: The GOOD, the BAD and the UGLY’, *Sustainability*, vol. 13, no. 9, p. 5302, May 2021, doi: 10.3390/su13095302.

[113] M. R. Shaharudin, S. Zailani, K.-C. Tan, J. Cross, and C. Hotrawaisaya, ‘Fostering closed-loop supply chain orientation by leveraging strategic green capabilities for circular economy performance: empirical evidence from Malaysian electrical and electronics manufacturing firms’, *Environ. Dev. Sustain.*, vol. 27, no. 10, pp. 24397–24434, Jan. 2023, doi: 10.1007/s10668-022-02832-3.

[114] X. Zeng, J. A. Mathews, and J. Li, ‘Urban Mining of E-Waste is Becoming More Cost-Effective Than Virgin Mining’, *Environ. Sci. Technol.*, vol. 52, no. 8, pp. 4835–4841, Apr. 2018, doi: 10.1021/acs.est.7b04909.

[115] Y. Kazancoglu, Y. D. Ozkan-Ozen, S. K. Mangla, and M. Ram, ‘Risk assessment for sustainability in e-waste recycling in circular economy’, *Clean Technol. Environ. Policy*, vol. 24, no. 4, pp. 1145–1157, May 2022, doi: 10.1007/s10098-020-01901-3.

[116] I. R. De Azua Lahidalga, E. M. Valor, D. J. Lozano, and J. M. F. Mendoza, ‘Circular Power Electronics: Exploring the Scope and Suitability of Ecodesign Criteria for the Power Electronics Industry’, in *2024 Electronics Goes Green 2024+ (EGG)*, Berlin, Germany: IEEE, Jun. 2024, pp. 1–8. doi: 10.23919/EGG62010.2024.10631184.

[117] R. H. Reich, J. Ayan, L. Alaerts, and K. Van Acker, ‘Defining the goals of Product Passports by circular product strategies’, *Procedia CIRP*, vol. 116, pp. 257–262, 2023, doi: 10.1016/j.procir.2023.02.044.

[118] M. Chen and O. A. Ogunseitan, ‘Zero E-waste: Regulatory impediments and blockchain imperatives’, *Front. Environ. Sci. Eng.*, vol. 15, no. 6, p. 114, Dec. 2021, doi: 10.1007/s11783-021-1402-x.

[119] C. Garrido-Hidalgo, F. J. Ramirez, T. Olivares, and L. Roda-Sanchez, ‘The adoption of internet of things in a circular supply chain framework for the recovery of WEEE: the case of lithium-ion electric vehicle battery packs’, *Waste Manag.*, vol. 103, pp. 32–44, Feb. 2020, doi: 10.1016/j.wasman.2019.09.045.

[120] H. Ali, H. A. Khan, and M. G. Pecht, ‘Circular economy of Li Batteries: Technologies and trends’, *J. Energy Storage*, vol. 40, p. 102690, Aug. 2021, doi: 10.1016/j.est.2021.102690.

[121] P. Schroeder, K. Anggraeni, and U. Weber, ‘The Relevance of Circular Economy Practices to the Sustainable Development Goals’, *J. Ind. Ecol.*, vol. 23, no. 1, pp. 77–95, Feb. 2019, doi: 10.1111/jiec.12732.

[122] X. Tong, T. Wang, Y. Chen, and Y. Wang, ‘Towards an inclusive circular economy: Quantifying the spatial flows of e-waste through the informal sector in China’, *Resour. Conserv. Recycl.*, vol. 135, pp. 163–171, Aug. 2018, doi: 10.1016/j.resconrec.2017.10.039.

[123] A. Shahbaz, ‘A systematic review on leaching of rare earth metals from primary and secondary sources’, *Miner. Eng.*, vol. 184, p. 107632, Jun. 2022, doi: 10.1016/j.mineng.2022.107632.

[124] C. Bai, G. Orzes, and J. Sarkis, ‘Exploring the impact of Industry 4.0 technologies on social sustainability through a circular economy approach’, *Ind. Mark. Manag.*, vol. 101, pp. 176–190, Feb. 2022, doi: 10.1016/j.indmarman.2021.12.004.

[125] S. Singh, M. S. Dasgupta, and S. Routroy, ‘Analysis of Critical Success Factors to Design E-waste Collection Policy in India: A Fuzzy DEMATEL Approach’, *Environ. Sci. Pollut. Res.*, vol. 29, no. 7, pp. 10585–10604, Feb. 2022, doi: 10.1007/s11356-021-16129-x.

[126] S. Mazahir, V. Verter, T. Boyaci, and L. N. Van Wassenhove, ‘Did Europe Move in the Right Direction on E‐waste Legislation?’, *Prod. Oper. Manag.*, vol. 28, no. 1, pp. 121–139, Jan. 2019, doi: 10.1111/poms.12894.

[127] A. Bal and F. Badurdeen, ‘A Multi-Objective Facility Location Model to Implement Circular Economy’, *Procedia Manuf.*, vol. 51, pp. 1592–1599, 2020, doi: 10.1016/j.promfg.2020.10.222.

[128] T. T. Sousa-Zomer, L. Magalhães, E. Zancul, L. M. S. Campos, and P. A. Cauchick-Miguel, ‘Cleaner production as an antecedent for circular economy paradigm shift at the micro-level: Evidence from a home appliance manufacturer’, *J. Clean. Prod.*, vol. 185, pp. 740–748, Jun. 2018, doi: 10.1016/j.jclepro.2018.03.006.

[129] A. Gautam, R. Shankar, and P. Vrat, ‘End-of-life solar photovoltaic e-waste assessment in India: a step towards a circular economy’, *Sustain. Prod. Consum.*, vol. 26, pp. 65–77, Apr. 2021, doi: 10.1016/j.spc.2020.09.011.

[130] R. G. Charles, P. Douglas, M. Dowling, G. Liversage, and M. L. Davies, ‘Towards Increased Recovery of Critical Raw Materials from WEEE– evaluation of CRMs at a component level and pre-processing methods for interface optimisation with recovery processes’, *Resour. Conserv. Recycl.*, vol. 161, p. 104923, Oct. 2020, doi: 10.1016/j.resconrec.2020.104923.

[131] K. Chaudhary and P. Vrat, ‘Circular economy model of gold recovery from cell phones using system dynamics approach: a case study of India’, *Environ. Dev. Sustain.*, vol. 22, no. 1, pp. 173–200, Jan. 2020, doi: 10.1007/s10668-018-0189-9.

[132] Rena, S. Yadav, S. Patel, D. J. Killedar, S. Kumar, and R. Kumar, ‘Eco-innovations and sustainability in solid waste management: An indian upfront in technological, organizational, start-ups and financial framework’, *J. Environ. Manage.*, vol. 302, p. 113953, Jan. 2022, doi: 10.1016/j.jenvman.2021.113953.

[133] S. Althaf, C. W. Babbitt, and R. Chen, ‘Forecasting electronic waste flows for effective circular economy planning’, *Resour. Conserv. Recycl.*, vol. 151, p. 104362, Dec. 2019, doi: 10.1016/j.resconrec.2019.05.038.

[134] D. Prajapati, S. Pratap, M. Zhang, Lakshay, and G. Q. Huang, ‘Sustainable forward-reverse logistics for multi-product delivery and pickup in B2C E-commerce towards the circular economy’, *Int. J. Prod. Econ.*, vol. 253, p. 108606, Nov. 2022, doi: 10.1016/j.ijpe.2022.108606.

[135] P. Nowakowski, K. Szwarc, and U. Boryczka, ‘Combining an artificial intelligence algorithm and a novel vehicle for sustainable e-waste collection’, *Sci. Total Environ.*, vol. 730, p. 138726, Aug. 2020, doi: 10.1016/j.scitotenv.2020.138726.

[136] I. Papamichael, G. Pappas, J. E. Siegel, and A. A. Zorpas, ‘Unified waste metrics: A gamified tool in next-generation strategic planning’, *Sci. Total Environ.*, vol. 833, p. 154835, Aug. 2022, doi: 10.1016/j.scitotenv.2022.154835.
